# Supplementary material for: TrkB-Induced Inhibition of R-SMAD/SMAD4 Activation is Essential for TGF-β-Mediated Tumor Suppressor Activity
Source: MDPI journal article supplement (doi:10.3390/cancers12041048), 2020-04-23
Supplement: s1 [file s1]

# TrkB-Induced Inhibition of R-SMAD/SMAD4 Activation is Essential for TGF- $\beta$ -Mediated Tumor Suppressor Activity

Min Soo Kim and Wook Jin

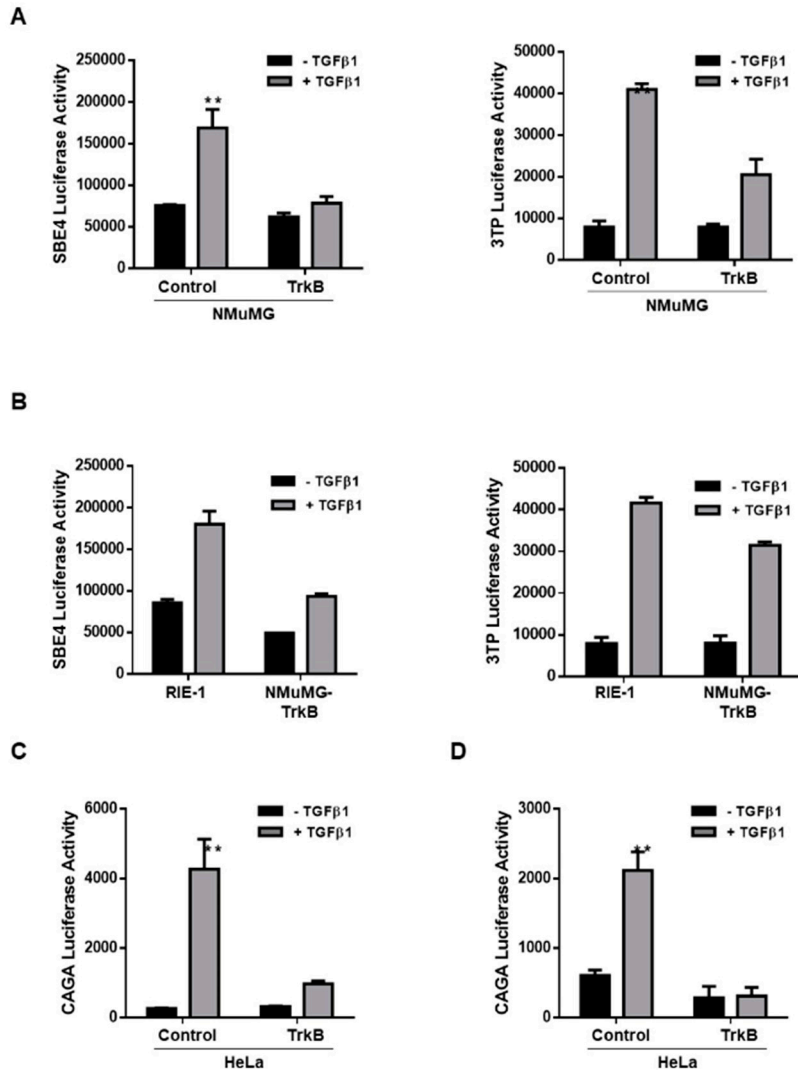

**Figure S1.** TrkB overexpression inhibits TGF- $\beta$  signaling. (A) Luciferase reporter assay of TGF- $\beta$ 1-responsive SBE4 and 3TP in NMuMG cells transfected with the TrkB. \*\* Control versus treatment with TGF- $\beta$ 1,  $p < 0.05$ .  $n = 3$ . (B) Luciferase reporter assay of TGF- $\beta$ 1-responsive SBE4 and 3TP in NMuMG or NMuMG-TrkB cells. \*\*Control versus treatment with TGF- $\beta$ 1,  $p < 0.05$ .  $n = 3$ . (C) Luciferase reporter assay of SMAD3-dependent (CAGA)<sub>12</sub>-Luc in HeLa cells transiently transfected with the TrkB. \*\*Control versus treatment with TGF- $\beta$ 1,  $p < 0.05$ .  $n = 3$ . (D) Luciferase reporter assay of SMAD3-dependent (CAGA)<sub>12</sub>-Luc in HeLa or HeLa-TrkB cells. \*\*Control versus treatment with TGF- $\beta$ 1,  $p < 0.05$ .  $n = 3$ .

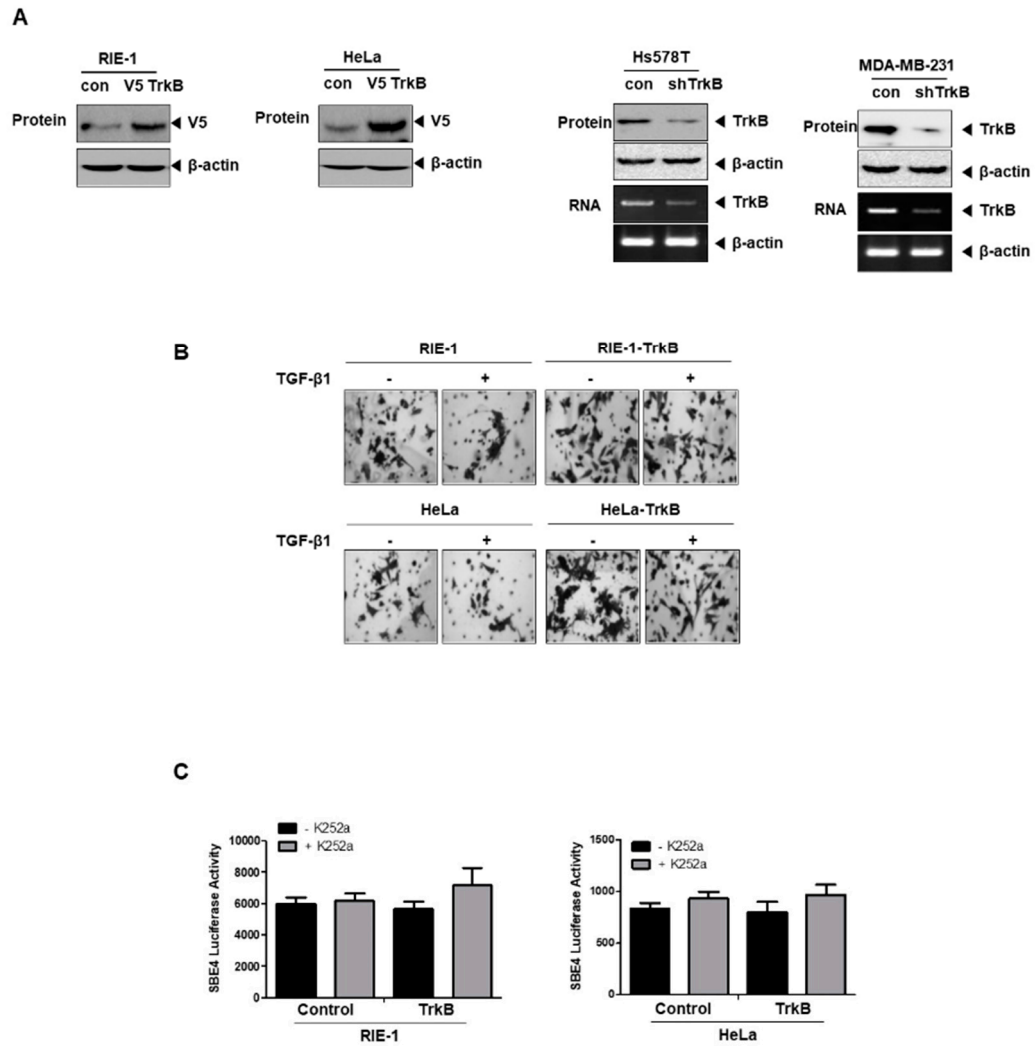

**Figure S2.** TrkB induces the migration ability of RIE-1 and HeLa cells. (A) Western blot analysis of V5-TrkB expression in HeLa, RIE-1, HeLa-TrkB, and RIE-1-TrkB cells, and RT-PCR and western blot analysis of TrkB expression in Hs578T, MDA-MB-231 control-shRNA or TrkB-shRNA cells.  $\beta$ -actin were used as loading controls (B) Migration assay of HeLa, RIE-1, HeLa-TrkB, and RIE-1-TrkB cells after treatment of TGF- $\beta$ 1 (5 ng/mL) (C) Luciferase reporter assay of K252a-responsive SBE in HeLa, RIE-1, HeLa-TrkB, and RIE-1-TrkB cells.

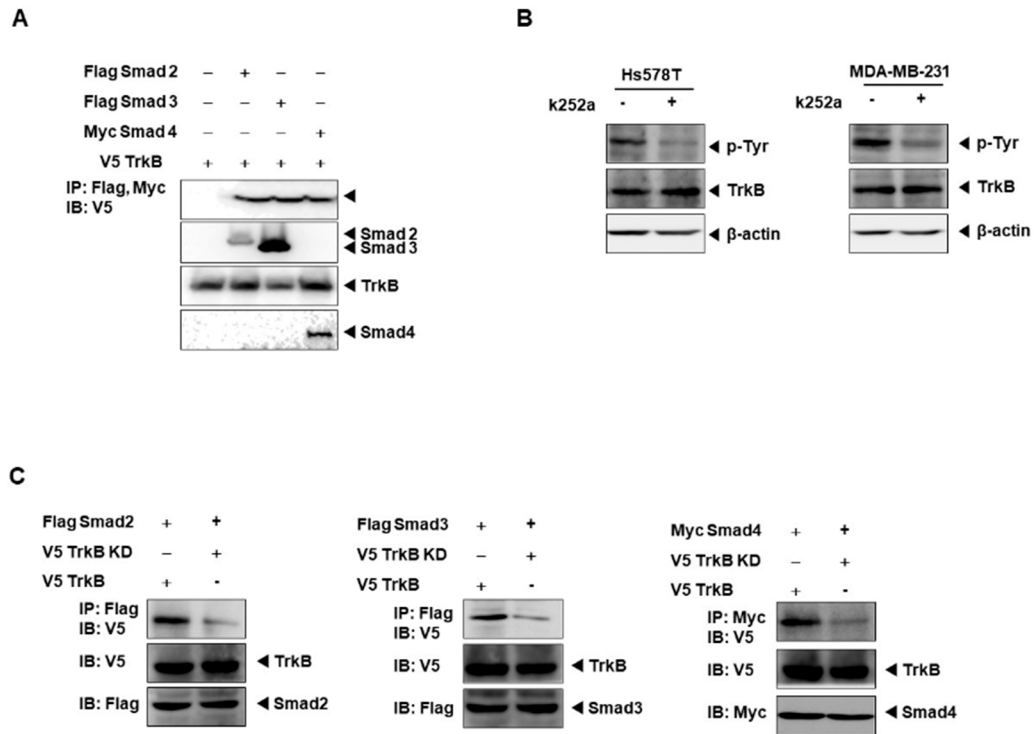

**Figure S3.** The kinase domain of TrkB essential for the complex TrkB/SMADs formation. (A) TrkB directly interacts with SMAD2, SMAD3, and SMAD4. Western blot analyses of V5-TrkB following immunoprecipitation of Flag-SMAD2, Flag-SMAD3, or Myc-SMAD4 from a whole-cell extract of transfected 293T cells. (B) Western blot analysis of TrkB activation in Hs578T and MDA-MB-231 cells with or without 100 nM K252a treatment.  $\beta$ -actin was used as a loading control. (C) Immunoblot analysis of whole-cell lysates and immunoprecipitates derived from 293T cells transfected with V5-TrkB or V5-TrkB KD constructs and Flag-SMAD2, Flag-SMAD3, or Myc-SMAD4 constructs as indicated.

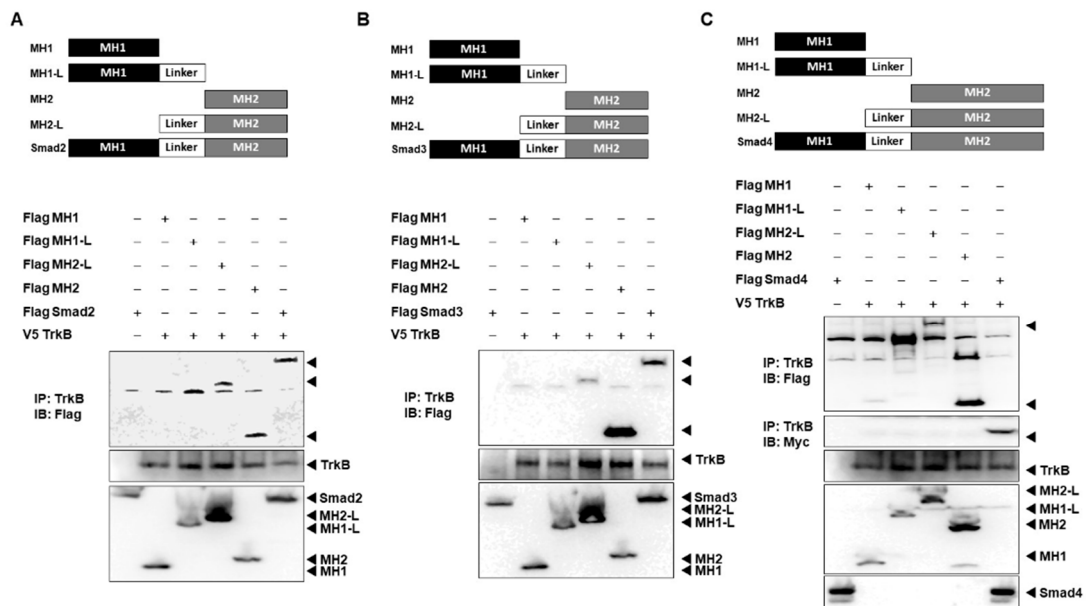

**Figure S4.** TrkB directly interacts with the MH2 domain of SMADs. (A) Western blot analyses of V5-TrkB following immunoprecipitation of Flag-SMAD2, or Flag-SMAD2 deletion constructs from a whole-cell extract of transfected 293T cells. (B) Western blot analyses of V5-TrkB following

immunoprecipitation of Flag-SMAD3, or Flag-SMAD3 deletion constructs from a whole-cell extract of transfected 293T cells. (C) Western blot analyses of V5-TrkB following immunoprecipitation of Myc-SMAD4, or Flag-SMAD4 deletion constructs from a whole-cell extract of transfected 293T cells.

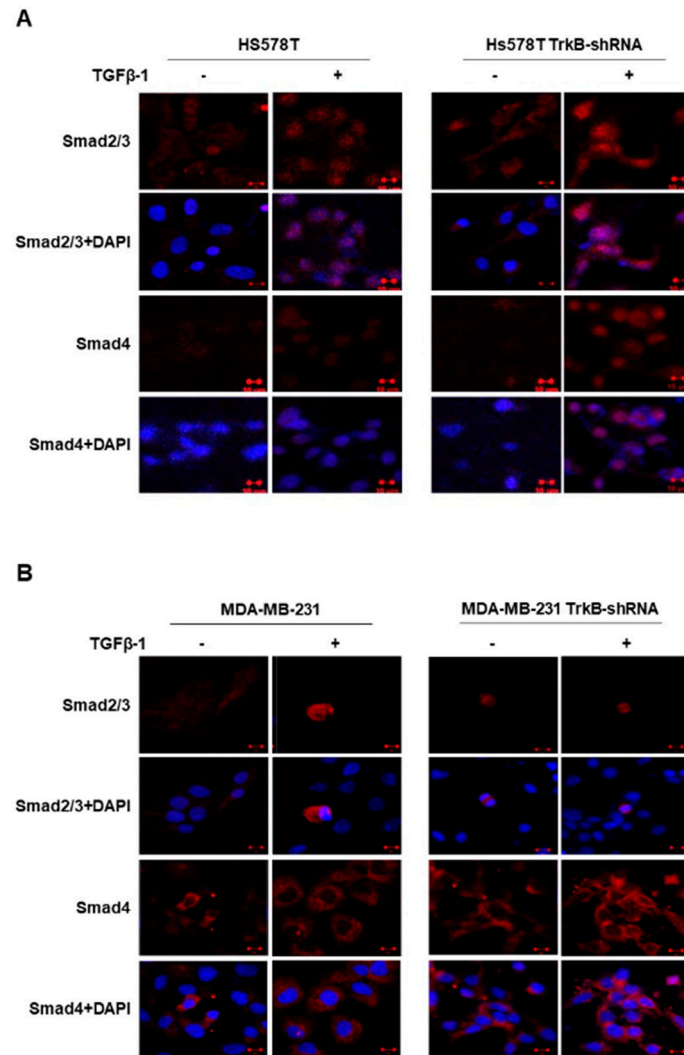

**Figure S5.** The loss of TrkB enhances nuclear retention of SMAD2, SMAD3, and SMAD4. (A) & (B) Immunofluorescence staining of SMAD2, SMAD3, and SMAD4 in MDA-MB-231 and HS578T control-shRNA or TrkB-shRNA cells after treatment with TGF- $\beta$ 1 (5 ng/mL) for 1 hour. The scale bar represents 10  $\mu$ m.

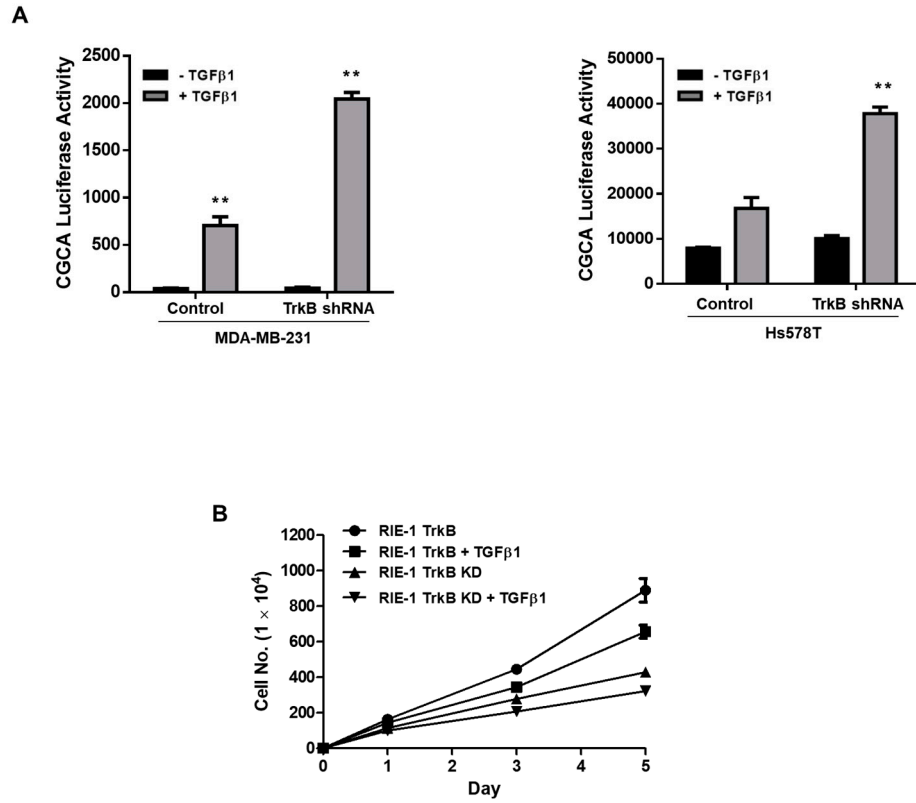

**Figure S6.** TGF- $\beta$ -mediated growth inhibition induced by Loss of kinase activity of TrkB. **(A)** Luciferase reporter assay of SMAD3-dependent (CAGA)<sub>12</sub>-Luc in MDA-MB-231- and Hs578T control-shRNA or TrkB-shRNA cells. \*\*Control versus treatment with TGF- $\beta$ 1,  $p < 0.05$ .  $n = 3$ . **(B)** cell growth of RIE-1-TrkB, and RIE-1-TrkB KD cells after treatment of TGF- $\beta$ 1 (5 ng/mL). Each data point represents the mean number of cells counted in three dishes.

Detailed Information about Western Blot

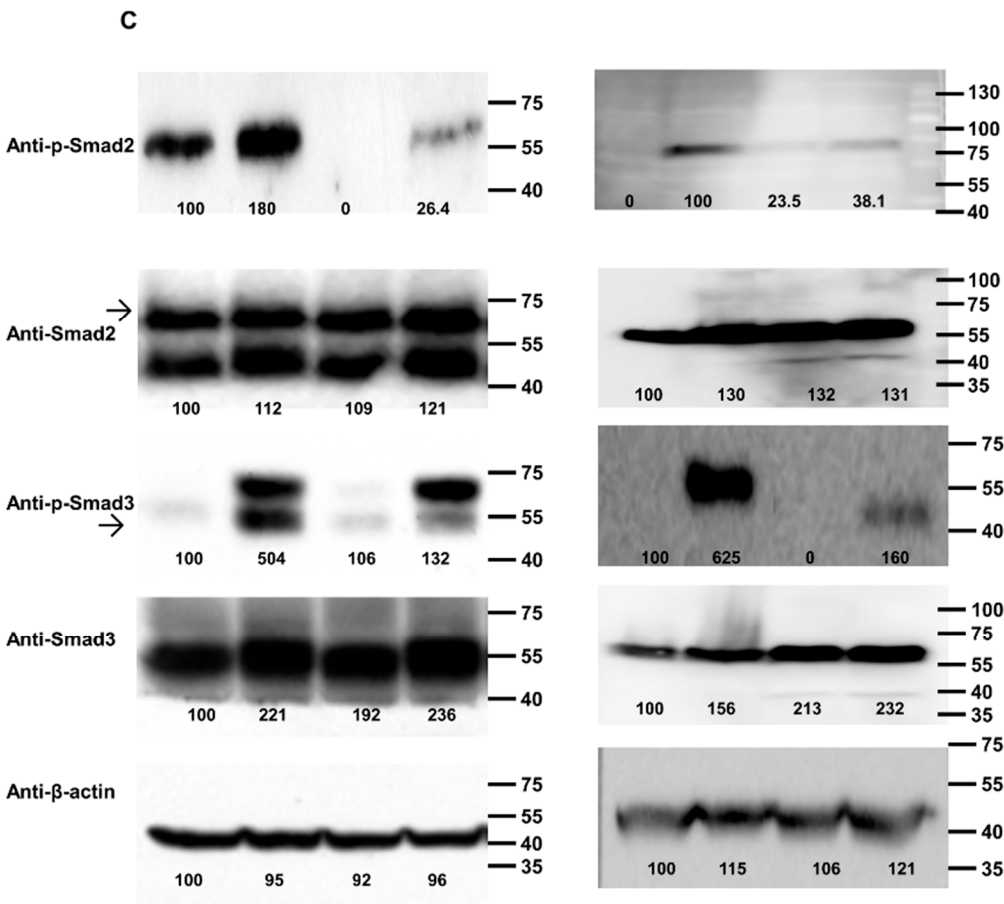

Detailed information about western blot of Figure 1C.

H

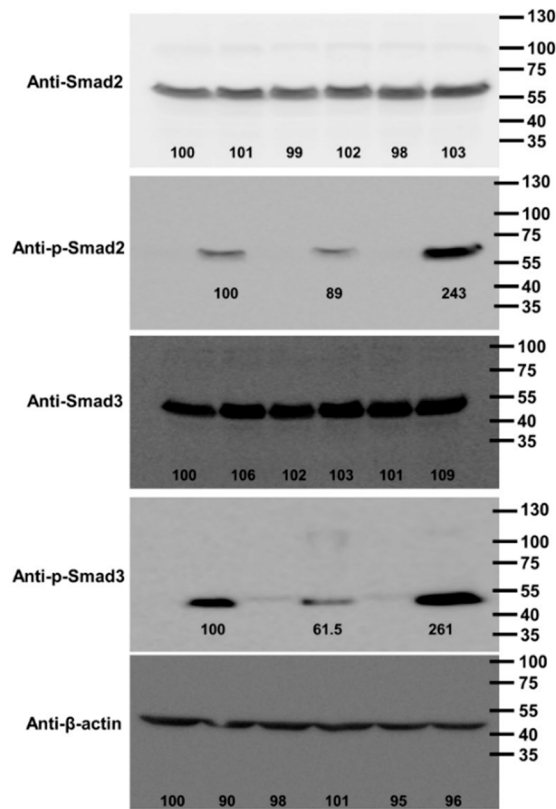

Detailed information about western blot of Figure 2H.

A

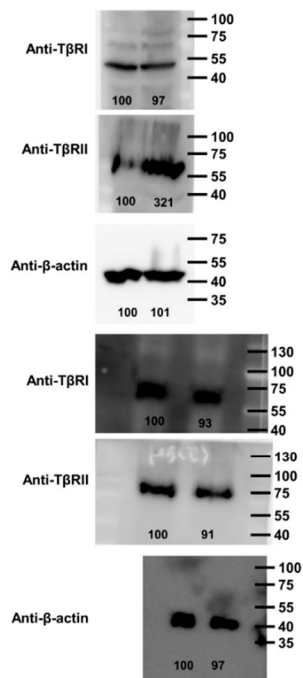

B

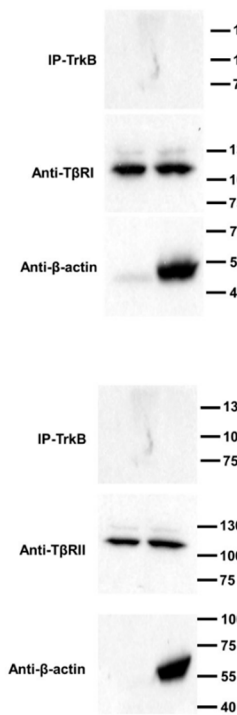

C

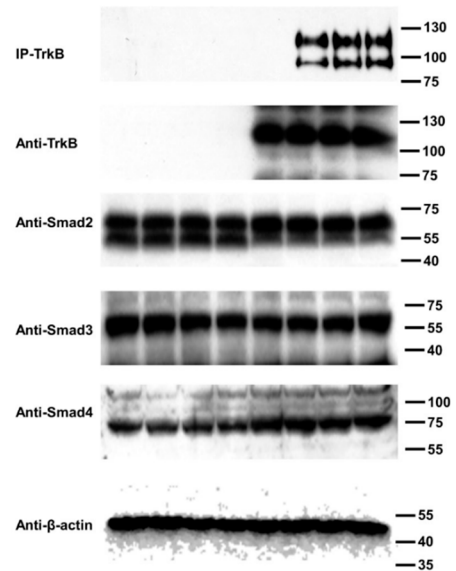

Detailed information about western blot of Figure 3A-C.

D

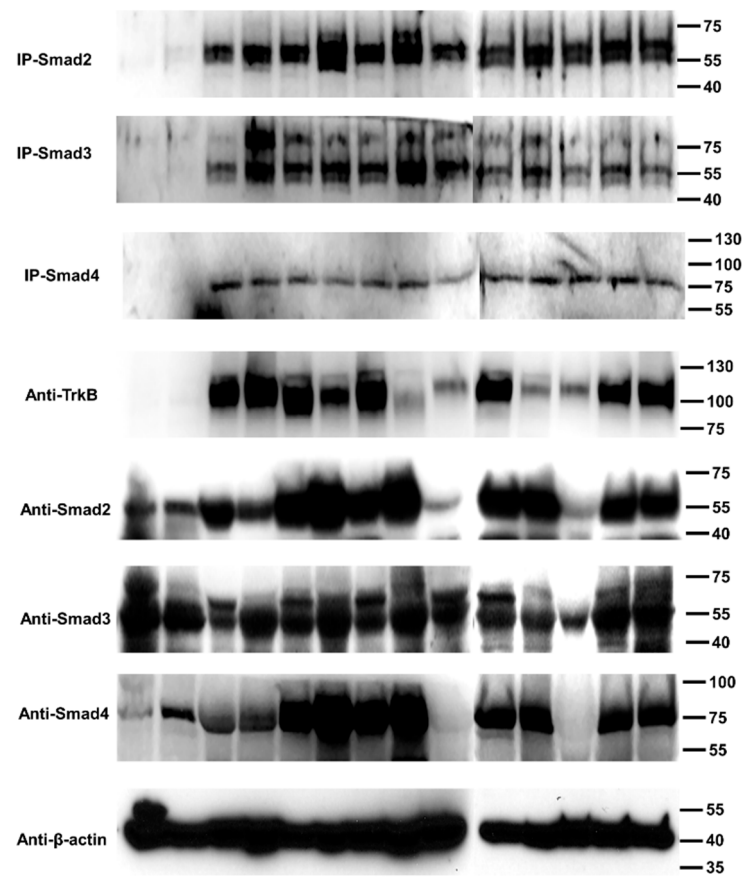

Detailed information about western blot of Figure 3D.



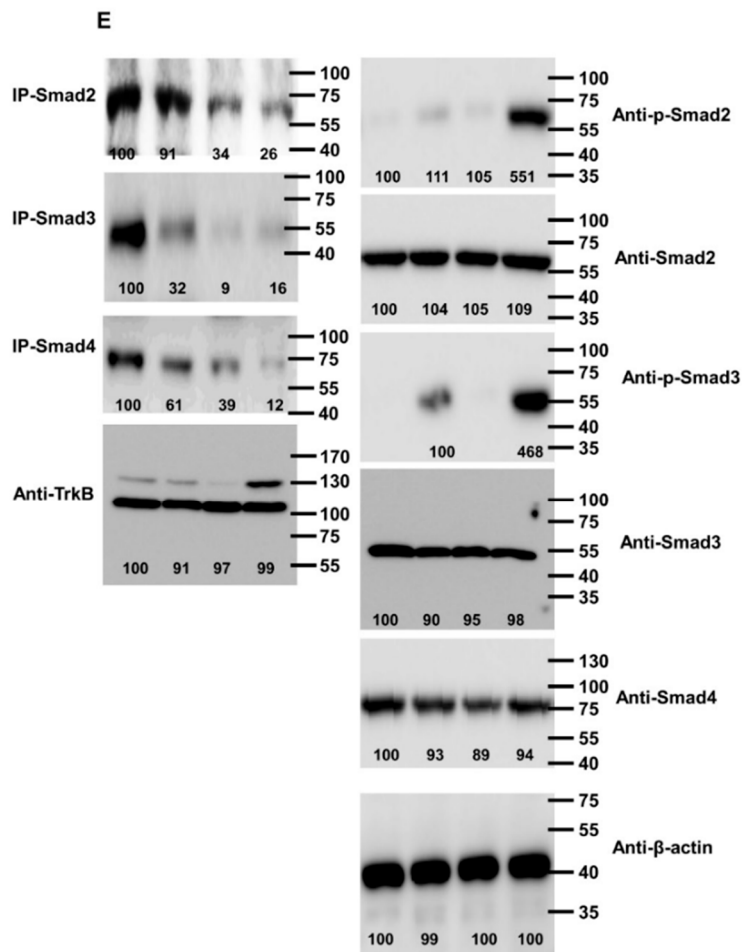

Detailed information about western blot of Figure 3E.

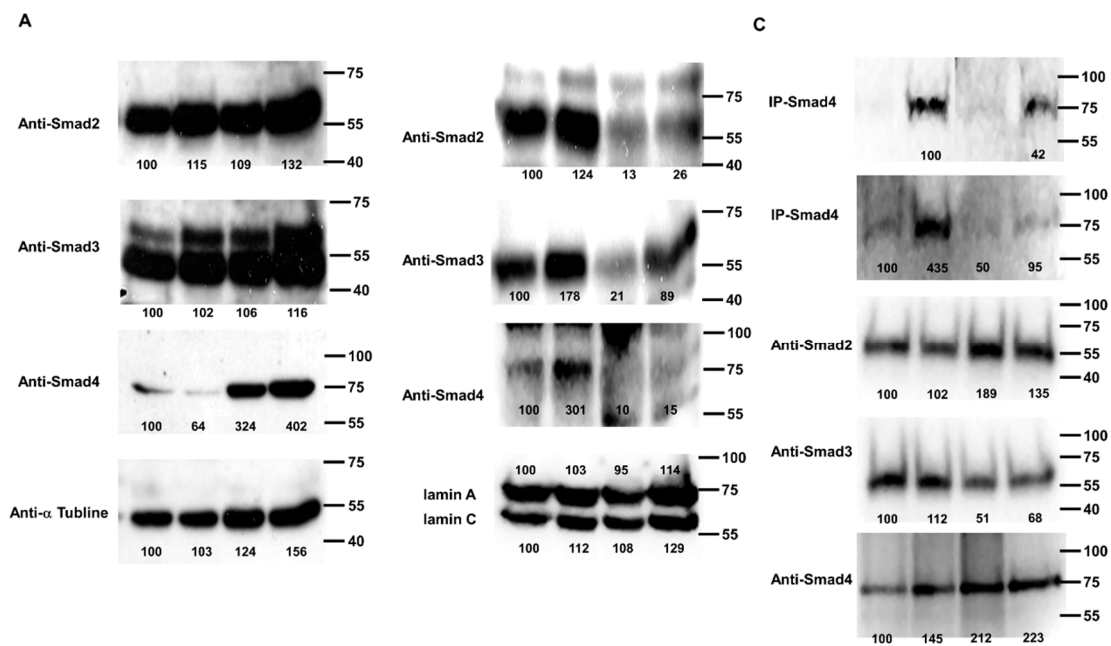

Detailed information about western blot of Figure 4A,C.

C

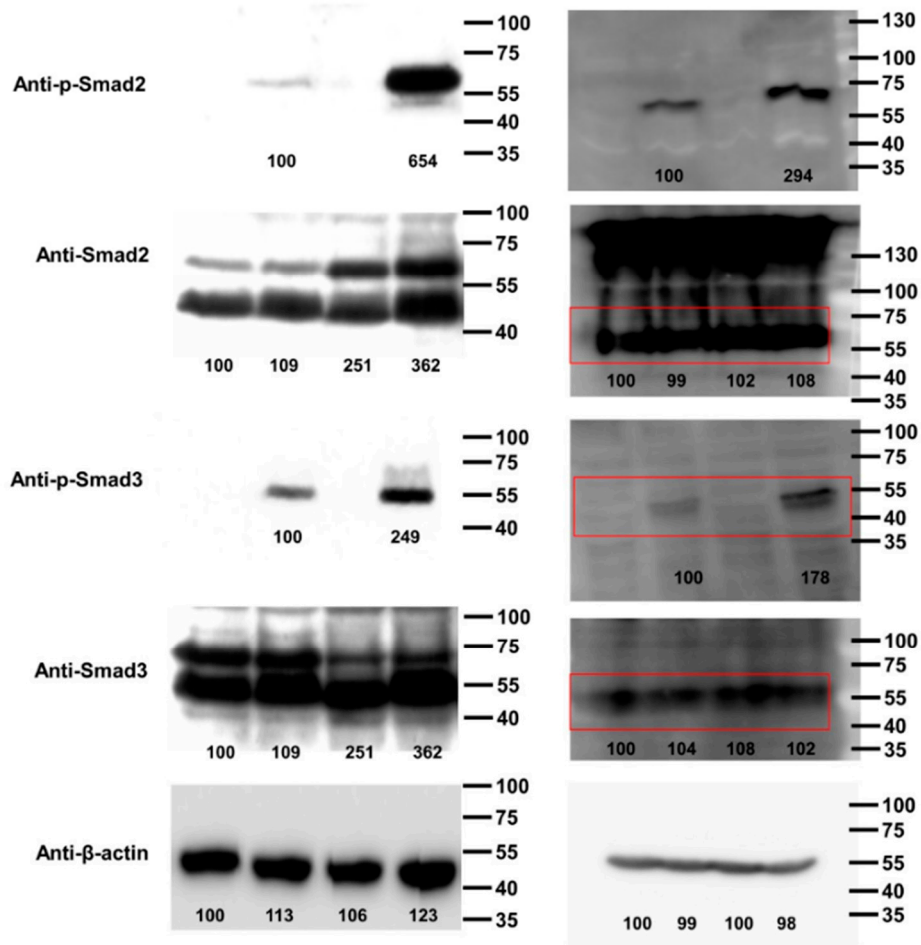

Detailed information about western blot of Figure 5C.

A

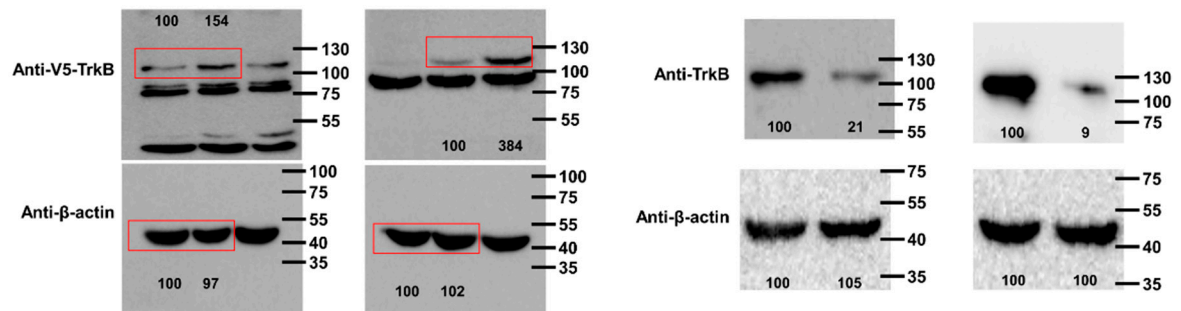

Detailed information about western blot of Figure S2A.

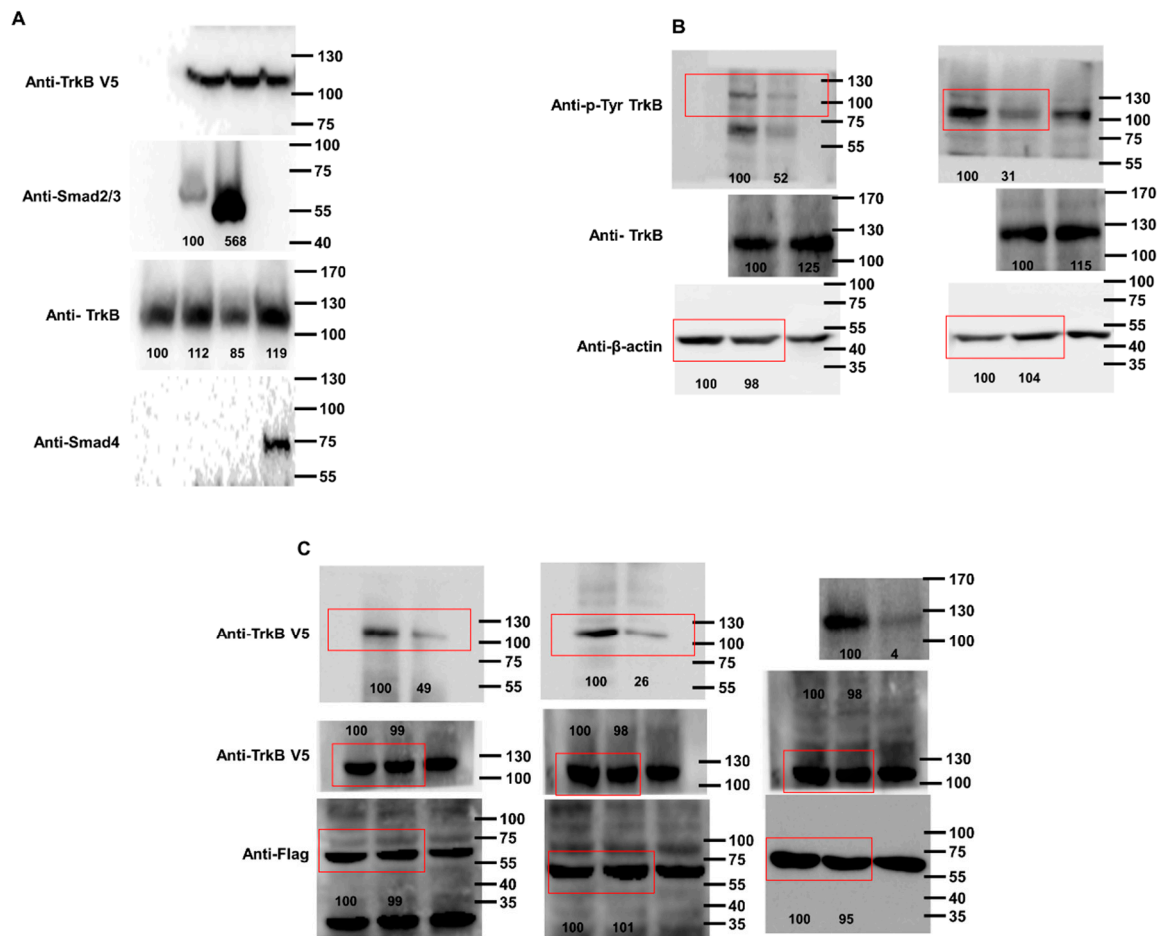

Detailed information about western blot of Figure S3A–C.

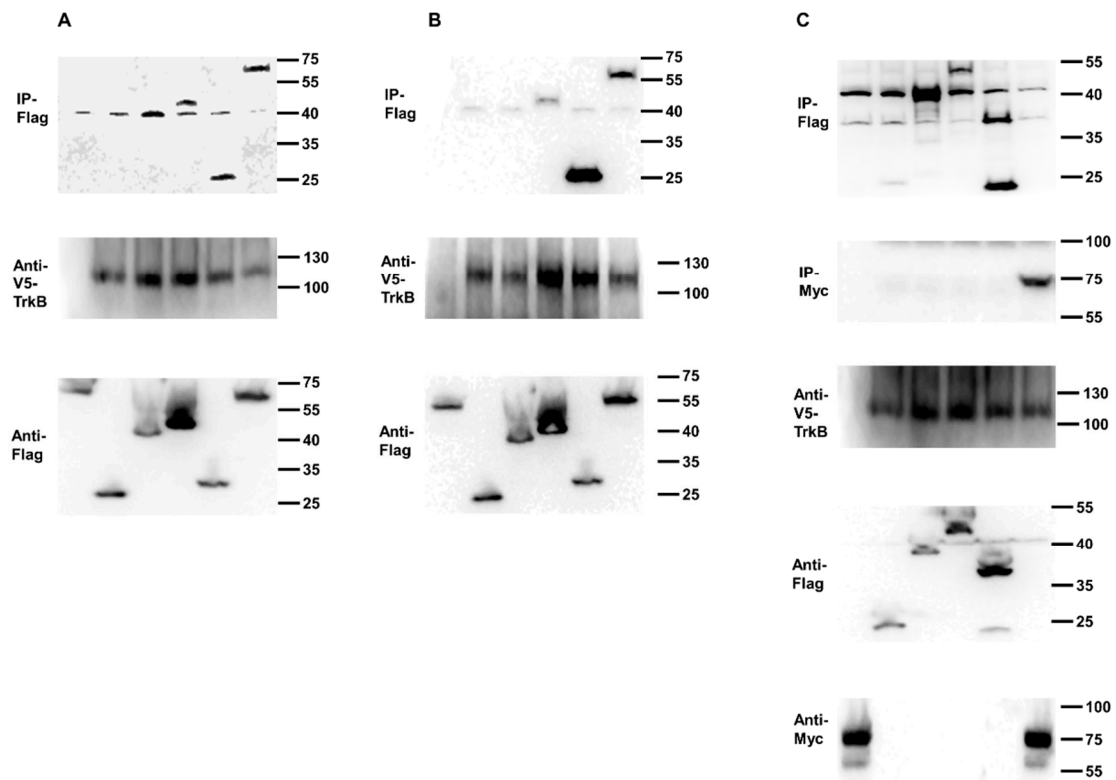

Detailed information about western blot of Figure S4A–C.

**Table S1.** Primer sequences for Cloning, RT-PCR.

| Gene                          | Primer Sequence                                                                    |
|-------------------------------|------------------------------------------------------------------------------------|
| For site-directed mutagenesis |                                                                                    |
| <i>TrkB K588M</i>             | F: 5'-CTTGGTGGCAGTGATGACCCTGAAGGATGC-3'<br>R: 3'-GCATCCTTCAGGGTCATCACTGCCACCAAG-3' |
| For RT-PCR                    |                                                                                    |
| <i>p15</i>                    | F: 5'-CCAGAAGCAATCCAGGCGCG-3'<br>R: 5'-CGTTGGCAGCCTTCATCG-3'                       |
| <i>p21</i>                    | F: 5'-TGAGCCGCGACTGTGATG-3'<br>R: 5'-GTCTCGGTGACAAAGTCGAAGTT-3'                    |
| <i>PAI-1</i>                  | F: 5'-TGC <u>ATC</u> GCCTGCCATTG-3'<br>R: 5'-GGACCTTGAGATAGGACAGTGCTT-3'           |
| <i>TMEPAI</i>                 | F: 5'-CAGGAACTCAAAACCGTCAC-3'<br>R: 5'-AATTCACCCGGAGCAGTGAT-3'                     |
| <i>β-actin</i>                | F: 5'-TCCCTGGAGAAGAGCTACGA-3'<br>R: 5'-AGCACTGTGTTGGCGTACAG-3'                     |

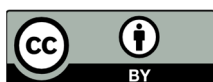

© 2020 by the authors. Licensee MDPI, Basel, Switzerland. This article is an open access article distributed under the terms and conditions of the Creative Commons Attribution (CC BY) license (<http://creativecommons.org/licenses/by/4.0/>).
